# Supplementary material for: Geomorphic regulation of floodplain soil organic carbon concentration in watersheds of the Rocky and Cascade Mountains, USA
Source: Copernicus journal article supplement (doi:10.5194/esurf-6-1101-2018), 2018-11-23
Supplement: Supplementary file 1 [file esurf-6-1101-2018-supplement.zip]

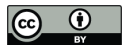

## *Supplement of*

# **Geomorphic regulation of floodplain soil organic carbon concentration in watersheds of the Rocky and Cascade Mountains, USA**

**Daniel N. Scott and Ellen E. Wohl**

*Correspondence to:* Daniel N. Scott ([dan.scott@colostate.edu](mailto:dan.scott@colostate.edu))

- [esurf-6-1101-2018-supplement-title-page.pdf](#)
- [table\\_s1.xlsx](#)

The copyright of individual parts of the supplement might differ from the CC BY 4.0 License.
